# Supplementary material for: Adjustment for index event bias in genome-wide association studies of subsequent events
Source: PubMed Central journal article supplement (PMC6450903; doi:10.1038/s41467-019-09381-w), 2019-04-05
Supplement: 41467_2019_9381_MOESM3_ESM.pdf [file 41467_2019_9381_MOESM3_ESM.pdf]

## Description of Additional Supplementary Files

Supplementary Data 1 :

Association statistics for 170 CD susceptibility SNPs in GWAS of prognosis
